# Supplementary material for: Deep Red Photoluminescence from Cr3+ in Fluorine-Doped Lithium Aluminate Host Material
Source: MDPI journal article supplement (doi:10.3390/ma17020338), 2024-01-10
Supplement: s1 [file s1]

Supplementary Materials

# Deep Red Photoluminescence from Cr<sup>3+</sup> in Fluorine-Doped Lithium Aluminate Host Material

Yuki Kamada <sup>1</sup>, Ryusei Hayasaka <sup>1</sup>, Kento Uchida <sup>1</sup>, Taisei Suzuki <sup>1</sup>, Takahiro Takei <sup>2</sup>, Mamoru Kitaura <sup>3</sup>, Hiroko Kominami <sup>4</sup>, Kazuhiko Hara <sup>5</sup> and Yuta Matsushima <sup>1,\*</sup>

<sup>1</sup> Applied Chemistry, Chemical Engineering, and Biochemical Engineering, Yamagata University, Yonezawa 992-8510, Japan

<sup>2</sup> Center for Crystal Science and Technology, University of Yamanashi, Kofu 400-0021, Japan

<sup>3</sup> Faculty of Science, Yamagata University, Yamagata 990-8560, Japan

<sup>4</sup> Faculty of Engineering, Shizuoka University, Hamamatsu 432-8561, Japan

<sup>5</sup> Research Institute of Electronics, Shizuoka University, Hamamatsu 432-8011, Japan

\* Correspondence: ymatsush@yz.yamagata-u.ac.jp; Tel.: +81-238-26-3165

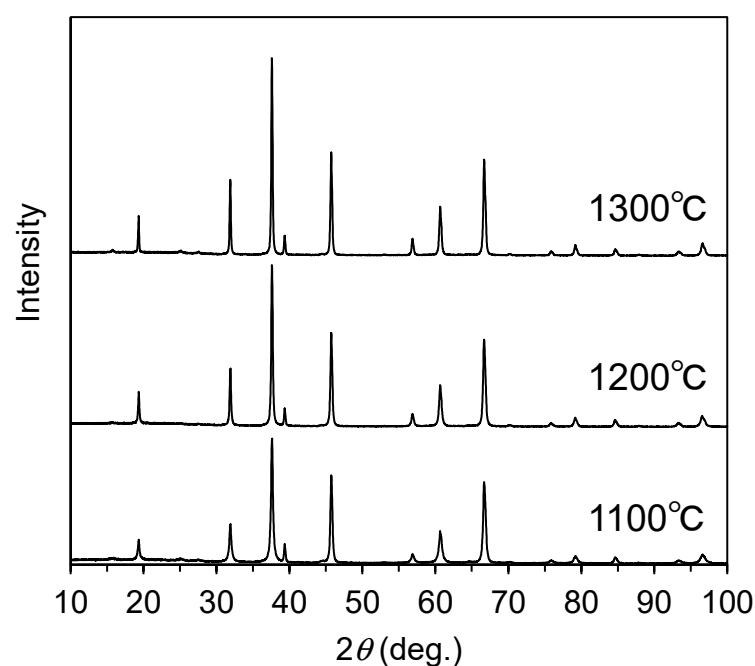

**Figure S1** XRD patterns of aluminum lithium fluoride oxide (ALFO) samples prepared at 1100°C, 1200°C, and 1300°C.

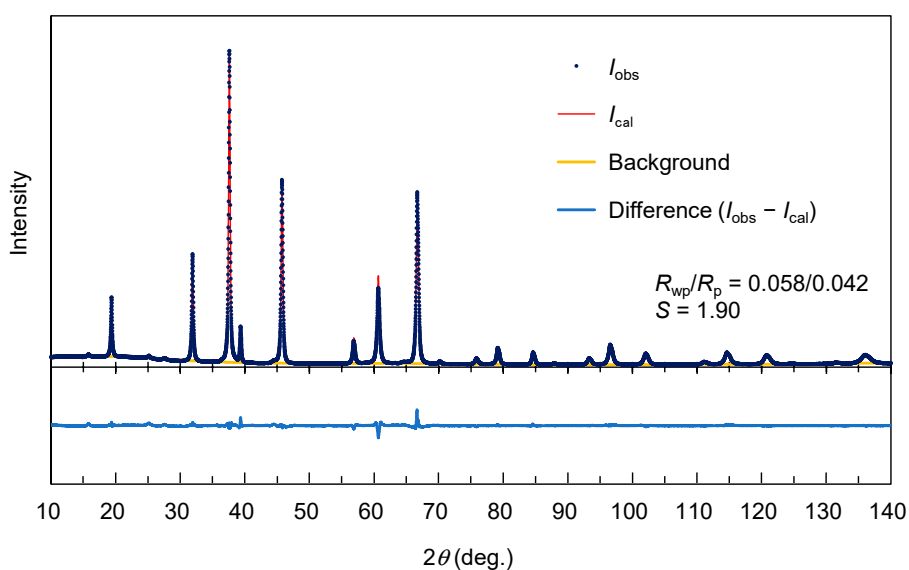

**Figure S2** The result of the Rietveld analysis for non-doped ALFO sample ( $Al_{4.73}Li_{1.27}F_{0.17}O_{7.65}$ ) prepared at 1200 °C.

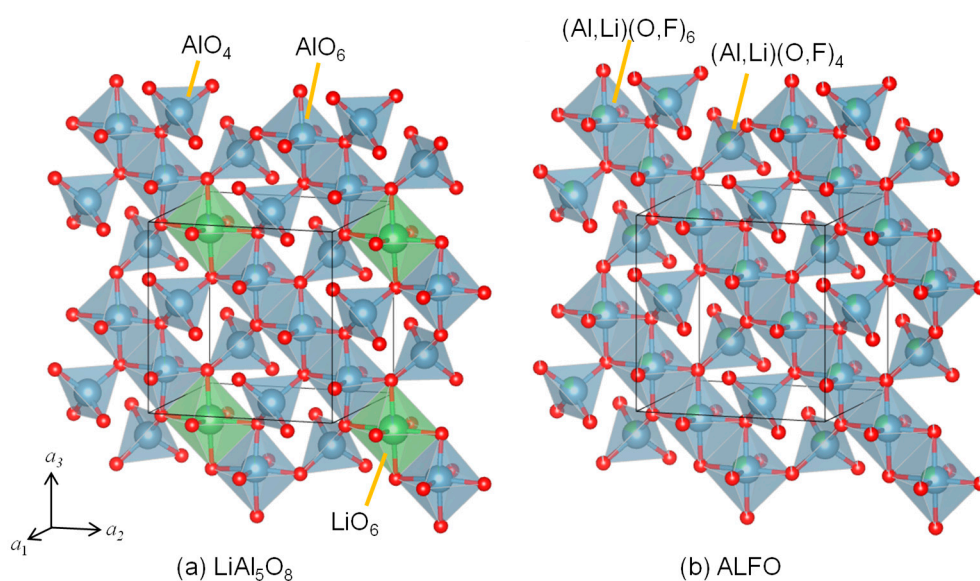

**Figure S3** Perspective view of the crystal structures of ordered  $LiAl_5O_8$  (a) and aluminum lithium fluoride oxide (ALFO) (b) in the range  $x = 0.2$  to  $0.6$  along  $\langle 100 \rangle$ , illustrating the difference in the arrangement of the tetrahedra and the octahedra in these host materials.

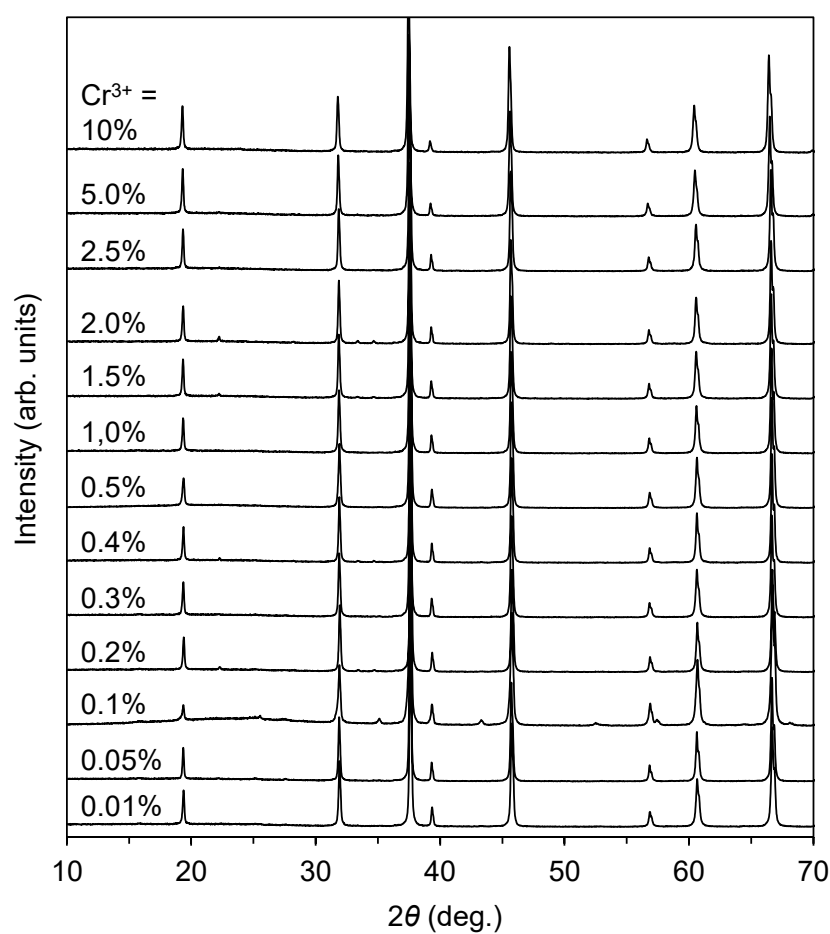

**Figure S4** XRD patterns of aluminum lithium fluoride oxide (ALFO) samples prepared at 1200°C with different Cr<sup>3+</sup> concentrations.

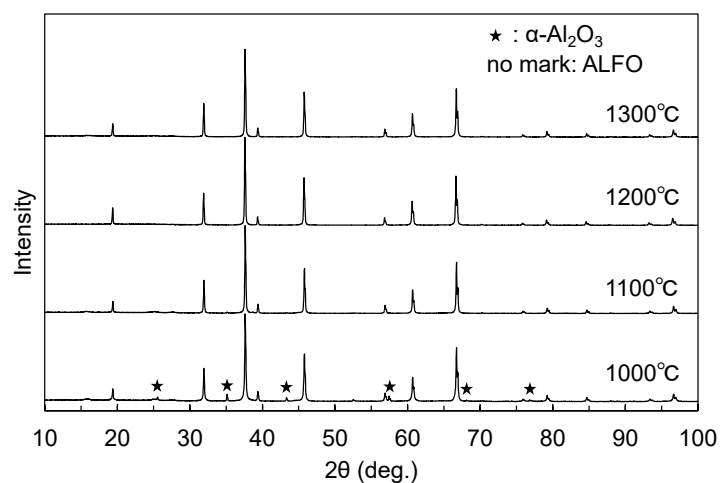

**Figure S5** XRD patterns of aluminum lithium fluoride oxide (ALFO) samples prepared at different temperatures.

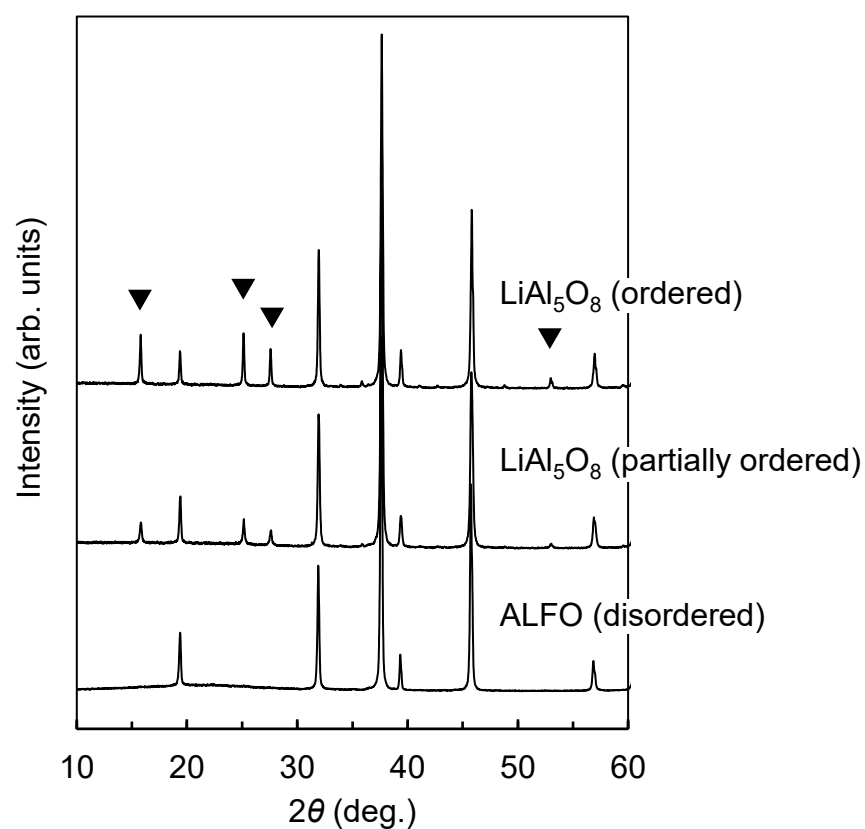

**Figure S6** Comparison of XRD patterns of disordered spinel (ALFO), ordered spinel (LiAl<sub>5</sub>O<sub>8</sub>), and partially ordered LiAl<sub>5</sub>O<sub>8</sub> prepared by quenching from 1400°C.

**Table S1** The structural parameters refined in the Rietveld analysis for non-doped ALFO sample ( $\text{Al}_{4.73}\text{Li}_{1.27}\text{F}_{0.17}\text{O}_{7.65}$ ) prepared at 1200°C.

| <b>Space group</b>      |                  | $Fd\bar{3}m$          |                 |                 |                 |                       |
|-------------------------|------------------|-----------------------|-----------------|-----------------|-----------------|-----------------------|
| <b>Lattice constant</b> |                  | 7.9222(8) Å           |                 |                 |                 |                       |
| $R_{wp} / R_p / S$      |                  | 0.058 / 0.042 / 1.90  |                 |                 |                 |                       |
| Atom                    | Wyckoff position | Occupancy, $g$        | $x$             | $y$             | $z$             | $B$ (Å <sup>2</sup> ) |
| Al1                     | 8a               | 0.817(1)              | 0               | 0               | 0               | 0.67(1)               |
| Li1                     | 8a               | 0.183                 | 0               | 0               | 0               | $= B(\text{Al1})$     |
|                         |                  | $= 1 - g(\text{Al1})$ |                 |                 |                 |                       |
| Al2                     | 16d              | 0.774                 | 5/8             | 5/8             | 5/8             | 0.79(1)               |
| Li2                     | 16d              | 0.226                 | 5/8             | 5/8             | 5/8             | $= B(\text{Al2})$     |
|                         |                  | $= 1 - g(\text{Al2})$ |                 |                 |                 |                       |
| O                       | 32e              | 0.9563                | 0.38139(4)      | $= x$           | $= x$           | 0.72(1)               |
| F                       | 32e              | 0.0213                | $= x(\text{O})$ | $= x(\text{O})$ | $= x(\text{O})$ | $= B(\text{O})$       |

**Table S2** Bond angles in  $\text{CrO}_6$  octahedra in  $\alpha\text{-Al}_2\text{O}_3$  and ordered  $\text{LiAl}_5\text{O}_8$  after relaxation by MD.

| $\alpha\text{-Al}_2\text{O}_3\text{:Cr}^{3+}$ |                                 | $\text{LiAl}_5\text{O}_8\text{:Cr}^{3+}$ |                                 |
|-----------------------------------------------|---------------------------------|------------------------------------------|---------------------------------|
| Bond angles (°)                               |                                 | Bond angle (°)                           |                                 |
| 76.3                                          | O1-Cr-O2, O2-Cr-O3,<br>O2-Cr-O3 | 81.3                                     | O2-Cr-O5, O4-Cr-O6              |
| 84.8-9                                        | O1-Cr-O4, O2-Cr-O5,<br>O3-Cr-O6 | 84.4                                     | O1-Cr-O5, O3-Cr-O6              |
| 89.5-7                                        | O1-Cr-O5, O2-Cr-O6,<br>O3-Cr-O4 | 86.5-6                                   | O2-Cr-O6, O4-Cr-O5              |
| 105.2-3                                       | O4-Cr-O5, O4-Cr-O6,<br>O5-Cr-O6 | 90.9-91.4                                | O1-Cr-O4, O2-Cr-O3,<br>O5-Cr-O6 |
|                                               |                                 | 100.2-7                                  | O1-Cr-O2, O1-Cr-O3,<br>O3-Cr-O4 |

**Table S3** Assignment of the ESR peaks of the polycrystalline sample of  $\text{Cr}^{3+}$  in  $\alpha\text{-Al}_2\text{O}_3$ .

| $\alpha\text{-Al}_2\text{O}_3\text{:Cr}^{3+}$ |                         |                    |
|-----------------------------------------------|-------------------------|--------------------|
| $g$ value                                     | Transition              | Angle ( $\theta$ ) |
| 3.79                                          | $-3/2 \rightarrow -1/2$ | 90°                |
| 2.26                                          | $-3/2 \rightarrow -1/2$ | 40°                |
| 1.72                                          | $-1/2 \rightarrow +1/2$ | 40°                |
| 1.46                                          | $+1/2 \rightarrow +3/2$ | 90°                |
